# Supplementary material
Source: Research Square preprint supplement (doi:10.21203/rs.3.rs-9637627/v1)
Supplement: Supplementary file 2 [file 926301706f9433e10b1b0cbc.docx]

**Pharmacists’ Experiences and Challenges in Eating Disorders Management in Malaysia: A Qualitative Insight**

# S1. Summary of Coding Framework

This supplementary file presents a structured summary of the coding framework developed during reflexive thematic analysis. Coding was conducted inductively and iteratively by the primary researcher, with themes and subthemes refined through ongoing discussion with co-authors, as described in the Methods section. The framework reflects the final organisation of patterned meanings across the dataset and is intended to illustrate the analytic structure rather than represent an exhaustive or fixed codebook. Coding was conducted at the semantic level, with meaning units ranging from phrases to extended participant responses.

# S2. Coding Framework

| Condensed Data Meaning (Paraphrased) | Initial Code *(from sub-subthemes)* | Final Subtheme | Final Theme |
| --- | --- | --- | --- |
| Recognition limited to anorexia nervosa and bulimia nervosa with simplified explanations | Presence of knowledge | Knowledge of ED | Limited and Symptom-based Understanding of ED |
| ED conceptualised broadly as overeating or undereating without differentiation | Gaps in awareness of ED | Knowledge of ED | Limited and Symptom-based Understanding of ED |
| ED associated primarily with mental illness or eating preferences | Misconception | Knowledge of ED | Limited and Symptom-based Understanding of ED |
| Identification of ED based on visible weight changes or eating behaviour | Physical symptoms | Signs, symptoms, and medical complications | Limited and Symptom-based Understanding of ED |
| Recognition of psychological factors such as low self-esteem or body image concerns | Psychological–psychiatric comorbidities | Signs, symptoms, and medical complications | Limited and Symptom-based Understanding of ED |
| Awareness of complications such as metabolic disturbances and gastrointestinal issues | Medical complications | Signs, symptoms, and medical complications | Limited and Symptom-based Understanding of ED |
| Observation of behaviours affecting daily functioning (e.g., low energy, disordered habits) | Behavioural signs affecting daily function and growth | Signs, symptoms, and medical complications | Limited and Symptom-based Understanding of ED |
| Knowledge derived from undergraduate exposure with limited depth | Formal education | Knowledge sources | Limited and Symptom-based Understanding of ED |
| Knowledge shaped through workplace encounters or patient exposure | Experiential learning | Knowledge sources | Limited and Symptom-based Understanding of ED |
| Pharmacists perceived as accessible first point of contact for patients | Belief in importance of pharmacists’ role | Attitude towards importance of pharmacists’ involvement | Willingness to Engage, but Uncertainty about Pharmacists’ Role |
| Recognition of importance of early detection and intervention | Importance of early detection–intervention | Attitude towards importance of pharmacists’ involvement | Willingness to Engage, but Uncertainty about Pharmacists’ Role |
| Perception that other professionals (e.g., psychologists, dietitians) play a larger role | Does not believe there is importance in pharmacists’ role | Attitude towards importance of pharmacists’ involvement | Willingness to Engage, but Uncertainty about Pharmacists’ Role |
| Comfort engaging in discussions about ED with patients | Positive attitude | Attitude towards communication in patient engagement | Willingness to Engage, but Uncertainty about Pharmacists’ Role |
| Willingness to engage depending on patient openness | Conditional comfort | Attitude towards communication in patient engagement | Willingness to Engage, but Uncertainty about Pharmacists’ Role |
| Preference to defer to other professionals to maintain scope of practice | Maintaining professional boundaries and scope | Attitude towards communication in patient engagement | Willingness to Engage, but Uncertainty about Pharmacists’ Role |
| Identification of ED through behavioural or clinical cues in practice | Screening and detection practice | Perceived role in preventing long-term complications | Willingness to Engage, but Uncertainty about Pharmacists’ Role |
| Referral of suspected cases to physicians or mental health services | Referral | Perceived role in preventing long-term complications | Willingness to Engage, but Uncertainty about Pharmacists’ Role |
| Involvement in counselling and medication-related management | Pharmacological management (including counselling) | Perceived role in preventing long-term complications | Willingness to Engage, but Uncertainty about Pharmacists’ Role |
| Recognition of need for additional ED-specific education and training | Need for ED-focused training | Perceived need for ED-focused training | Willingness to Engage, but Uncertainty about Pharmacists’ Role |
| Patients reluctant to disclose or seek help despite advice | Patient’s reluctance to disclose or seek help | Independent barrier | Barriers and Challenges in Practice |
| Workload, staffing, and institutional constraints in hospital settings | Hospital pharmacists (structural constraints) | Independent barrier | Barriers and Challenges in Practice |
| Limited engagement due to nature of community pharmacy interactions | Community pharmacists (practice constraints) | Independent barrier | Barriers and Challenges in Practice |
| Lack of formal education or training limiting ability to manage ED | Insufficient training/education | Dependent barrier | Barriers and Challenges in Practice |
| Lack of experience and confidence in handling ED cases in hospital setting | Hospital pharmacists (experience and communication gaps) | Dependent barrier | Barriers and Challenges in Practice |
| Uncertainty about role and lack of exposure in community setting | Community pharmacists (role uncertainty and exposure gap) | Dependent barrier | Barriers and Challenges in Practice |

Data meanings were condensed and paraphrased to avoid duplication with the main manuscript. Initial codes correspond to sub-subthemes identified during analysis and were iteratively refined into subthemes and overarching themes.

**S3. Note on Interpretation**

The coding framework was developed through continuous and reflexive engagement with the data. Codes, subthemes, and themes were iteratively refined rather than derived from a predetermined structure. Consistent with reflexive thematic analysis, themes were actively constructed by the researchers to capture patterned meanings in pharmacists’ accounts of knowledge, roles, and barriers related to eating disorder care.
